# Supplementary material for: Identifiability and experimental design in perturbation studies
Source: PubMed Central journal article supplement — Bioinformatics. 2020 Jul 13;36(Suppl 1):i482–9. doi: 10.1093/bioinformatics/btaa404 (PMC7355299; doi:10.1093/bioinformatics/btaa404), 2020-07-13
Supplement: btaa404_supplementary_data.pdf [file btaa404_supplementary_data.pdf]

# SUPPLEMENT: Identifiability and experimental design in perturbation studies

Torsten Gross<sup>1,2,3</sup> and Nils Blüthgen<sup>1,2,3</sup>

<sup>1</sup>Charité - Universitätsmedizin Berlin, Institut für Pathologie, Berlin, Germany,

<sup>2</sup>IRI Life Sciences, Humboldt University, Berlin, Germany

<sup>3</sup>Berlin Institute of Health, Berlin, Germany

Sections [S1](#) and [S2](#) constitute an extended version of the sections on identifiability and identifiability relationships in the Methods part of the main text. They include additional information and examples, and explicit derivations that were abbreviated in the main text.

Section [S4](#) provides additional details and data for the optimization of experimental design in KEGG pathways.

## S1 Identifiability

We want to consider a network of  $n$  interacting nodes whose abundances or magnitudes,  $\mathbf{x}$ , evolve in time according to a set of (unknown) differential equations

$$\dot{\mathbf{x}} = \mathbf{f}(\mathbf{x}, \mathbf{p}). \quad (1)$$

We assume that we can experimentally manipulate the system with  $p$  different types of perturbations, each of which is represented by one of the  $p$  entries of parameter vector  $\mathbf{p}$ . We shall only consider binary perturbations that can either be fully switched on or off. To keep notation simple and without loss of generality, we thus define  $\mathbf{f}(\mathbf{x}, \mathbf{p})$ , such that the  $k$ -th type of perturbation changes parameter  $p_k$  from its unperturbed state  $p_k = 0$  to a perturbed state  $p_k = 1$ .

One of the main assumptions about the observed system is that its temporal dynamics eventually relaxes into different constant states depending on the performed perturbation. These states are thought to represent stable fixed points,  $\boldsymbol{\varphi}(\mathbf{p})$ , of [Equation 1](#), where stability arises because the real parts of the eigenvalue of the  $n \times n$  Jacobian matrix,  $J_{ij}(\mathbf{x}, \mathbf{p}) = \partial f_i(\mathbf{x}, \mathbf{p}) / \partial x_j$ , evaluated at these fixed points,  $\mathbf{x} = \boldsymbol{\varphi}(\mathbf{p})$ , are all negative within the experimentally accessible perturbation space (no bifurcation points). This implies that  $J(\boldsymbol{\varphi}(\mathbf{p}), \mathbf{p})$  is invertible, for which case the implicit function theorem states that  $\boldsymbol{\varphi}(\mathbf{p})$  is unique and continuously differentiable, and

$$\frac{\partial \varphi_k}{\partial p_i} = - [J^{-1} S]_{ki}, \quad (2)$$

where  $n \times p$  sensitivity matrix entry,  $S_{ij} = \partial f_i(\mathbf{x}, \mathbf{p}) / \partial p_j$ , quantifies the effect of the  $j$ -th perturbation type on node  $i$ . Dropping functions' arguments is

shorthand for the evaluation at the unperturbed state,  $\mathbf{x} = \boldsymbol{\varphi}(\mathbf{0})$  and  $\mathbf{p} = \mathbf{0}$ .

## A linear response approximation

A perturbation experiment consists of  $q$  perturbations, each of which involves a single or a combination of perturbation types, represented by binary vector  $\mathbf{p}$ . These vectors shall form the  $p \times q$  design matrix  $P$ . After each perturbation the system is allowed sufficient time until the newly established steady states,  $\boldsymbol{\varphi}(\mathbf{p})$ , can be measured. Let their differences to the unperturbed steady state form the columns of the  $n \times q$  global response matrix  $R$ . The central approximation is to assume that perturbations are sufficiently mild, such that the steady state function becomes nearly linear within the relevant parameter domain,

$$\boldsymbol{\varphi}_k(\mathbf{p}) - \boldsymbol{\varphi}_k(\mathbf{0}) \approx \sum_{l=1}^p \frac{\partial \varphi_k}{\partial p_l} p_l. \quad (3)$$

Replacing the partial derivative with the help of [Equation 2](#) and writing the equation for all  $q$  perturbations yields

$$R \approx -J^{-1} S P. \quad (4)$$

Note that this equation holds exactly and independent of perturbation strength for a linear system

$$\dot{\mathbf{x}} = J\mathbf{x} + S\mathbf{p},$$

which can be seen by considering its steady state

$$\mathbf{x}^0 = J^{-1} S \mathbf{p}.$$

The crux of [Equation 4](#) is that it relates the known experimental design matrix,  $P$ , and the measured global responses,  $R$ , to quantities that we wish to infer, namely the nodes' interaction strengths,  $J$ , and their sensitivity to perturbations,  $S$ . Thus, as a next step we shall rewrite the equation to disentangle the known and the unknown entries.

A dynamic system defined by rates  $\tilde{\mathbf{f}}(\mathbf{x}, \mathbf{p}) = W \mathbf{f}(\mathbf{x}, \mathbf{p})$ , with any full rank  $n \times n$  matrix  $W$ , has the same steady states but different Jacobian and sensitivity matrices, namely  $WJ$  and  $WS$ , as the original

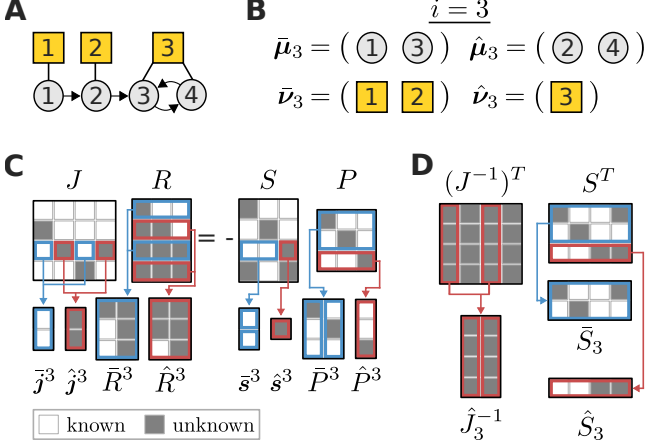

**Figure S1:** Three perturbations (yellow squares) are performed on a toy network (A). Network topology and perturbation targets determine the index lists from Equation 5 and Equation 6. Here they are depicted for  $i = 3$  (B). A graphical representation of Equation 4 demonstrates the definition of various matrix partitions (C and D).

system, defined by Equation 1. It is thus impossible to uniquely infer  $J$  or  $S$  from observations of the global response alone. However, some entries in matrices  $J$  and  $S$  might be known a priori and thus further constrain the problem. This is the case, when e.g. certain reactions rates are known. Typically however, such values are hard to come by. Rather, we assume prior knowledge about the network topology. That is, we know the zero entries in  $J$  as they correspond to non-existent edges. Likewise, we assume to know the targets of the different types of perturbations which imply zero entries in  $S$ -rows corresponding to perturbations that are known to not directly affect the network node associated with that row. In line with prior studies, we fix the diagonal of the Jacobian matrix

$$J_{ii} = -1.$$

Thus, for the  $i$ -th row of  $J$  we can define index lists  $\bar{\mu}_i$  and  $\hat{\mu}_i$ , with

$$|\bar{\mu}_i| + |\hat{\mu}_i| = n, \quad (5)$$

identifying its known and unknown entries. The first correspond to missing edges or the self loop and the second to edges going into node  $i$ . Analogously, for the  $i$ -th row of  $S$  we define index lists  $\bar{\nu}_i$  and  $\hat{\nu}_i$ , with

$$|\bar{\nu}_i| + |\hat{\nu}_i| = p, \quad (6)$$

to report its unknown and known entries. These describe the perturbations that do not target or respectively target node  $i$ , see Figure S1B.

To see whether prior knowledge about  $J$  and  $S$  entries could render other entries determinable, we first rewrite Equation 4 as  $n$  linear equation systems

$$R^T \mathbf{j}_i = -P^T \mathbf{s}_i, \quad i = 1, 2, \dots, n, \quad (7)$$

one for each column in  $J^T$  and  $S^T$ , denoted as  $\mathbf{j}_i$  and  $\mathbf{s}_i$ . Then, we collect the known and unknown  $\mathbf{j}_i$ -entries into

vectors  $\bar{\mathbf{j}}_i$  and  $\hat{\mathbf{j}}_i$  following the indexing by  $\bar{\mu}_i$  and  $\hat{\mu}_i$ . In the same manner,  $\mathbf{s}_i$  is split into the known vector  $\bar{\mathbf{s}}_i$  and unknown vector  $\hat{\mathbf{s}}_i$  according to  $\bar{\nu}_i$  and  $\hat{\nu}_i$ . To rewrite Equation 7 as a linear system of the unknown variables, we first partition its terms into known and unknown parts

$$R^T \mathbf{j}_i = \bar{R}_i \bar{\mathbf{j}}_i + \hat{R}_i \hat{\mathbf{j}}_i \quad \text{and} \quad P^T \mathbf{s}_i = \bar{P}_i \bar{\mathbf{s}}_i + \hat{P}_i \hat{\mathbf{s}}_i,$$

where  $q \times |\bar{\mu}_i|$  matrix  $\bar{R}_i$  and  $q \times |\hat{\mu}_i|$  matrix  $\hat{R}_i$  consist of those columns of  $R^T$  that are selected by  $\bar{\mu}_i$  and  $\hat{\mu}_i$ , respectively. Analogously,  $q \times |\bar{\nu}_i|$  matrix  $\bar{P}_i$  and  $q \times |\hat{\nu}_i|$  matrix  $\hat{P}_i$  are formed from the columns of  $P^T$  selected by  $\bar{\nu}_i$  and  $\hat{\nu}_i$ , respectively. These vector and matrix partitions are illustrated in Figure S1C. Introducing abbreviations

$$\mathbf{x}_i = \begin{bmatrix} \hat{\mathbf{j}}_i \\ \hat{\mathbf{s}}_i \end{bmatrix} \quad \text{and} \quad \mathbf{k}_i = [\bar{R}_i \quad \bar{P}_i] \begin{bmatrix} \bar{\mathbf{j}}_i \\ \bar{\mathbf{s}}_i \end{bmatrix},$$

an equivalent reformulation of Equation 7 reads

$$\begin{bmatrix} \hat{R}_i & \hat{P}_i \end{bmatrix} \mathbf{x}_i = -\mathbf{k}_i, \quad i = 1, 2, \dots, n. \quad (8)$$

The point of such algebraic acrobatics is that Equation 8 represents systems of linear equations, each in the

$$u_i = |\hat{\mu}_i| + |\hat{\nu}_i|$$

unknown parameters  $\mathbf{x}_i$ , compared to Equation 7 in which the solution vector comprised unknown and known components. It thus allows to study the identifiability of  $\mathbf{x}_i$ .

## Identifiability conditions

Clearly, Equation 8 is underdetermined if

$$d_i = u_i - \text{rank}(\begin{bmatrix} \hat{R}_i & \hat{P}_i \end{bmatrix}) > 0.$$

To analyse this solution space dimensionality, let  $n \times |\hat{\mu}_i|$  matrix  $\hat{J}_i^{-1}$  consist of the columns of  $(J^{-1})^T$  that are selected by  $\hat{\mu}_i$ . Similarly,  $|\bar{\nu}_i| \times n$  matrix  $\bar{S}^i$  and  $|\hat{\nu}_i| \times n$  matrix  $\hat{S}^i$  shall be formed by taking rows of  $S^T$  according to indices in  $\bar{\nu}_i$  and  $\hat{\nu}_i$ , as shown in Figure S1D. Also, we have  $I_i$  denote the  $i$ -dimensional identity matrix and  $0_{i,j}$  the  $i \times j$  zero-matrix. We use these definitions and Equation 4 to write

$$\hat{R}_i = -P^T S^T \hat{J}_i^{-1} \quad \text{and} \quad P^T S^T = [\hat{P}_i \quad \bar{P}_i] \begin{bmatrix} \hat{S}_i \\ \bar{S}_i \end{bmatrix},$$

and arrive at

$$\begin{bmatrix} \hat{R}_i & \hat{P}_i \end{bmatrix} = -[\hat{P}_i \quad \bar{P}_i] \Psi_i, \quad \text{with} \quad (9)$$

$$\Psi_i = \begin{bmatrix} \hat{S}_i \hat{J}_i^{-1} & I_{|\hat{\nu}_i|} \\ \bar{S}_i \hat{J}_i^{-1} & 0_{|\bar{\nu}_i|, |\hat{\nu}_i|} \end{bmatrix}. \quad (10)$$

Note that  $[\hat{P}_i \quad \bar{P}_i]$  is nothing but a rearrangement of the columns of  $P^T$  and therefore

$$\text{rank}([\hat{P}_i \quad \bar{P}_i]) = \text{rank}(P) = p.$$

Claiming  $P$  to have rank  $p$  assumes that throughout the experiment every type of perturbation was applied in a non-trivial combination. This is not a limiting constraint as it is for example satisfied for a perturbation scheme in which each type of perturbation is applied once individually, which is the case for the examples discussed here.

From  $[\hat{P}_i \ \bar{P}_i]$  having full (column) rank follows that

$$\begin{aligned} \text{rank}([\hat{R}_i \ \hat{P}_i]) &= \text{rank}(\Psi_i) \\ &= \text{rank}([\hat{S}_i \hat{J}_i^{-1} \ I_{|\hat{\nu}_i|}]) + \text{rank}([\bar{S}_i \hat{J}_i^{-1} \ 0_{|\bar{\nu}_i|, |\hat{\nu}_i|}]) \\ &= |\hat{\nu}_i| + \text{rank}(\bar{S}_i \hat{J}_i^{-1}), \end{aligned}$$

so that the solution subspace has dimensionality

$$d_i = |\hat{\mu}_i| - \text{rank}(\bar{S}_i \hat{J}_i^{-1}). \quad (11)$$

From the dimensionality of matrix product  $\bar{S}_i \hat{J}_i^{-1}$  we can conclude that  $d_i \geq \max(0, n - |\hat{\mu}_i| - |\bar{\nu}_i|)$ . Thus, to fully determine  $\mathbf{x}_i$  we need to provide at least as many elements of prior knowledge as there are nodes in the network, which agrees with our earlier observation that we can transform the rate equations with an arbitrary  $n \times n$  matrix without altering the steady states.

If indeed  $d_i > 0$ , there is a  $u_i \times d_i$  matrix  $V_i$  whose columns form a basis of the kernel of  $[\hat{R}_i \ \hat{P}_i]$ , so that, given  $\tilde{\mathbf{x}}_i$ , a specific solution to Equation 8, any

$$\mathbf{x}_i = V_i \mathbf{w} + \tilde{\mathbf{x}}_i, \quad \forall \mathbf{w} \in \mathbb{R}^{d_i} \quad (12)$$

is also a solution of Equation 8. But even though the equation system is then underdetermined, not all network parameters are necessarily unidentifiable. Rather,

$$\begin{aligned} [\mathbf{x}_i]_j \text{ identifiable} &\iff \mathbf{e}_j^T V_i = 0 \\ &\iff \exists \mathbf{w} \in \mathbb{R}^{d_i} : [\hat{R}_i \ \hat{P}_i]^T \mathbf{w} = \mathbf{e}_j, \end{aligned} \quad (13)$$

where  $\mathbf{e}_j$  is the  $j$ -th standard basis vector of according length. We shall use Equation 9 to reformulate this identifiability condition. To this end, recall the earlier assertion about the full (column) rank of  $[\hat{P}_i \ \bar{P}_i]$ , from which follows that

$$\forall \tilde{\mathbf{w}} \in \mathbb{R}^p, \exists \mathbf{w} \in \mathbb{R}^q : \tilde{\mathbf{w}}^T = \mathbf{w}^T [\hat{P}_i \ \bar{P}_i],$$

so that we can write

$$[\mathbf{x}_i]_j \text{ identifiable} \iff \exists \tilde{\mathbf{w}} \in \mathbb{R}^p : \tilde{\mathbf{w}}^T \Psi_i = \mathbf{e}_j^T.$$

Next, let  $\tilde{\mathbf{w}}_1$  and  $\tilde{\mathbf{w}}_2$  consist of the first  $|\hat{\nu}_i|$  and the last  $|\bar{\nu}_i|$  components of  $\tilde{\mathbf{w}}$ , such that  $\tilde{\mathbf{w}}^T = [\tilde{\mathbf{w}}_1^T \ \tilde{\mathbf{w}}_2^T]$ . Accordingly, standard base vector  $\mathbf{e}_j$  is split into its first  $|\hat{\nu}_i|$  and last  $|\bar{\nu}_i|$  components,  $\mathbf{e}_j^T = [\mathbf{f}_j^T \ \mathbf{g}_j^T]$ . This allows to rewrite the previous equation as

$$\begin{aligned} \tilde{\mathbf{w}}_1 &= \mathbf{g}_j, \text{ and} \\ \tilde{\mathbf{w}}_2^T (\bar{S}_i \hat{J}_i^{-1}) &= \mathbf{f}_j^T - \mathbf{g}_j^T (\hat{S}_i \hat{J}_i^{-1}). \end{aligned}$$

Recall that  $[x_i]_j$  denotes unknown interaction strengths for  $j \leq |\hat{\nu}_i| \iff \mathbf{g}_j = \mathbf{0}$  and thus

$$\begin{aligned} [\hat{\mathbf{j}}_i]_j \text{ identifiable} &\iff \text{rank} \left( \begin{bmatrix} \bar{S}_i \hat{J}_i^{-1} \\ \mathbf{f}_j^T \end{bmatrix} \right) = \text{rank}(\bar{S}_i \hat{J}_i^{-1}) \\ &\iff 1 + \text{rank}(\bar{S}_i \hat{J}_i^{-1}) = \text{rank}(\bar{S}_i \hat{J}_i^{-1}), \end{aligned} \quad (14)$$

where  $\hat{J}_i^{-1}$  is matrix  $\hat{J}_i^{-1}$  with the  $j$ -th column removed. For the unknown sensitivity coefficients, where  $j > |\hat{\nu}_i| \iff \mathbf{f}_j = \mathbf{0}$ , we find the identifiability conditions

$$\begin{aligned} [\hat{\mathbf{s}}_i]_j \text{ identifiable} \\ \iff \text{rank} \left( \begin{bmatrix} \bar{S}_i \\ \hat{S}_i^j \end{bmatrix} \hat{J}_i^{-1} \right) = \text{rank}(\bar{S}_i \hat{J}_i^{-1}), \end{aligned} \quad (15)$$

where  $\hat{S}_i^j$  denotes the  $j$ -th row of matrix  $\hat{S}_i$ .

## Structural identifiability

The identifiability conditions in equations 14 and 15 relate the identifiability of the unknown parameters to a discussion of the rank of matrix product  $\bar{S}_i \hat{J}_i^{-1}$ . The product however depends on the unknown parameters themselves, so that its rank cannot be directly computed. Here we show that a reasonable assumption make this possible nevertheless and allows to express the identifiability conditions as a very intuitive maximum flow problem.

First, we rewrite the identity  $J^{-1}J = I_n$  as

$$[J^{-1}]_{kl} = \sum_{m \neq l} [J^{-1}]_{km} [J]_{ml} - \delta_{kl},$$

with  $\delta_{kl}$  being the Kronecker delta (recall that  $J_{ll} = -1$ ). We can view this equation as a recurrence relation and repeatedly replace the  $[J^{-1}]_{km}$  terms in the sum. The sum contains non-vanishing terms for each edge that leaves node  $l$ . Therefore, each replacement leads to the next downstream node, so that eventually one arrives at

$$\begin{aligned} [J^{-1}]_{kl} &= l \rightsquigarrow k [J^{-1}]_{kk}, \text{ with} \\ l \rightsquigarrow k &= \sum_{\omega \in \Omega_{l \rightarrow k}} \prod_{m=1}^{|\omega|-1} [J]_{\omega_{m+1} \omega_m}, \end{aligned}$$

where the set  $\Omega_{l \rightarrow k}$  contains elements,  $\omega$ , for every path from node  $l$  to node  $k$ , each of which lists the nodes along that path. Strictly speaking, these elements are walks rather than paths because some nodes will appear multiple times if loops exist between  $l$  and  $k$ . With loops,  $\Omega_{l \rightarrow k}$  even contains an infinite number of walks of unbounded lengths. But as the real part of all eigenvalues of  $J$  are assumed negative, the associated products of interaction strengths will eventually converge to zero with increasing walk length. Here however, we can safely ignore these subtleties.

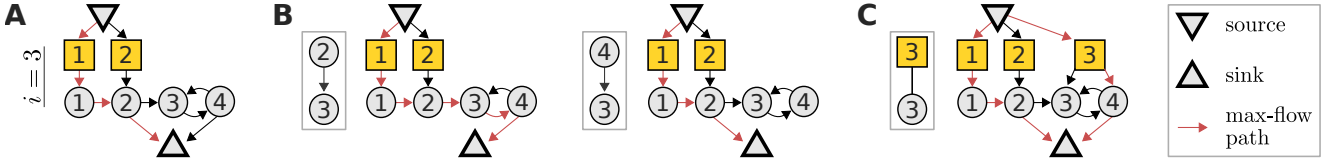

**Figure S2:** A maximum flow problem determines the identifiability of interaction strengths and perturbation sensitivities when reconstructing a network from perturbation data. Here, this is illustrated for the toy model from Figure S1A. To inquire about the identifiability of either edges going into node 3, or the sensitivity of node 3 to perturbations, we construct a flow network (A) with unit edge and node capacities, as described in the text. We highlight in red a path carrying the maximal flow of one. While this max-flow path is not unique, no other combination of paths could yield a larger flow. The interaction strength between a given node and node 3 is identifiable if and only if the maximum flow is reduced after removing that node's edge to the sink node (B). Yet here, we can always find alternative max-flow paths that re-establish a unit-flow after removal of the according edges. Thus the respective edges are non-identifiable. Similarly, the sensitivity of node 3 to perturbation 3 is identifiable if and only if a specific extension of the flow network (C) does not increase the maximum flow. But here the maximum flow is indeed increased by one, which again reveals non-identifiability. Such flow representations also provide an intuitive understanding on how alterations in the network or perturbation setting affect identifiability. For example, it is obvious that if the toy model would not contain an edge from node 3 to 4, the edge from 2 to 3 would become identifiable.

To simplify our notation, we want to expand the network by considering perturbations  $\bar{\nu}_i$  as additional nodes, each with edges that are directed towards that perturbation's targets. Furthermore, letting the interaction strength associated with these new edges be given by the appropriate entries in  $S$  we can rewrite the matrix product

$$\left[\bar{S}_i \hat{J}_i^{-1}\right]_{kl} = \bar{\nu}_{ik} \rightsquigarrow \hat{\mu}_{il} [J^{-1}]_{\hat{\mu}_{il} \hat{\mu}_{il}}$$

where  $\hat{\mu}_{il}$  and  $\bar{\nu}_{il}$  denote the  $l$ -th entry in  $\hat{\mu}_i$  and  $\bar{\nu}_i$ , respectively. As every finite-dimensional matrix has a rank decomposition, we can further write

$$\bar{S}_i \hat{J}_i^{-1} = \Upsilon_i Y_i, \quad (16)$$

where  $|\bar{\nu}_i| \times \text{rank}(\bar{S}_i \hat{J}_i^{-1})$  matrix  $\Upsilon_i$  and  $\text{rank}(\bar{S}_i \hat{J}_i^{-1}) \times |\hat{\mu}_i|$  matrix  $Y_i$  have full rank. Finding such a decomposition therefore reveals the rank of  $\bar{S}_i \hat{J}_i^{-1}$ . To this end, we propose

$$[\Upsilon_i]_{kn} = \bar{\nu}_{ik} \rightsquigarrow y_{in}, \text{ and } [Y_i]_{nl} = y_{in} \rightsquigarrow \hat{\mu}_{il} [J^{-1}]_{\hat{\mu}_{il} \hat{\mu}_{il}},$$

where  $y_{in}$  denotes the  $n$ -th component of a certain node set  $\mathbf{y}_i$ . In order for Equation 16 to hold, it must be possible to split each path from any perturbation  $\bar{\nu}_{il}$  to any node  $\hat{\mu}_{il}$  into a section that leads from the perturbation to a node in  $\mathbf{y}_i$  and a subsequent section that leads from this node to  $\hat{\mu}_{il}$ . For an extended graph that includes an additional source node, with outgoing edges to each perturbation in  $\bar{\nu}_i$ , and an additional sink node, with incoming edges from all nodes in  $\hat{\mu}_i$  (see Figure S2A),  $\mathbf{y}_i$  thus constitutes a vertex cut whose removal disconnects the graph and separates the source and the sink node into distinct connected components. Next, we want to show that if  $\mathbf{y}_i$  is a minimum vertex cut, the rank of  $\bar{S}_i \hat{J}_i^{-1}$  equals the size of  $\mathbf{y}_i$ . Because Equation 16 is a rank decomposition this is equivalent to showing that the according matrices  $\Upsilon_i$  and  $Y_i$  have full rank. To do so we apply Menger's theorem [11], which states that the minimal size of  $\mathbf{y}_i$  equals the maximum number of vertex-disjoint paths from the source to the sink node. This also implies that each of these vertex-disjoint paths

goes through a different node of the vertex cut  $\mathbf{y}_i$ . Recall that entries in  $\Upsilon_i$  constitute sums over paths from perturbation to vertex cut nodes, so that we could write

$$\Upsilon_i = \tilde{\Upsilon}_i + \hat{\Upsilon}_i,$$

where  $\tilde{\Upsilon}_i$  only contains the vertex-disjoint paths and  $\hat{\Upsilon}_i$  the sums over the remaining paths. As each of these vertex disjoint paths ends in a different vertex cut node, any column in  $\tilde{\Upsilon}_i$  can contain no more than a single non-zero entry. Furthermore, as a consequence of Menger's theorem there are exactly  $|\mathbf{y}_i|$  non-zero columns. Because these paths are indeed vertex disjoint also no row in  $\tilde{\Upsilon}_i$  has more than a single non-zero entry. Thus, the non-zero columns are independent, showing that  $\tilde{\Upsilon}_i$  has full rank. We further assume that adding  $\hat{\Upsilon}_i$  does not reduce rank, which also gives  $\Upsilon_i$  full rank. In the context of biological networks there are two different scenarios that could lead to a violation of this non-cancellation assumption. The first is that network parameters are perfectly tuned to lie inside a specific algebraic variety (a manifold in parameter space) such that certain columns (or rows) of  $\Upsilon_i$  become linearly dependent or zero. This would for example be the case if, for a given vertex disjoint path, there also is an alternative path whose associated product of interaction strengths has the same magnitude as that of the vertex disjoint path but opposite sign, making their sum vanish. However, we consider it implausible for biological networks to be fine-tuned to such a degree that they could achieve such perfect self-compensation of perturbations, and rule out this possibility. A more realistic scenario is that network parameters are zero and thereby lead to zero columns or rows in  $\Upsilon_i$  or  $Y_i$ , which make these matrices rank deficient. In practice, such zero-parameters can occur, for example, if a perturbation is not effective on (one of) its target(s), or if robustness effects [7] obstruct the propagation of the perturbation signal at a certain link. But essentially, this means that our prior knowledge about the network included practically non-existing links or perturbation targets. If the network topology and perturbation targets are

correctly stated and take these effects into consideration, there will be no zero-parameters and therefore the non-cancellation assumption holds. We explore the consequences of incomplete or flawed prior knowledge in [section S5](#).

Having shown  $\Upsilon_i$  to be of full rank, the same line of reasoning will demonstrate a full rank for matrix  $Y_i$  as well, which implies that indeed

$$\text{rank}(\bar{S}_i \hat{J}_i^{-1}) = |\mathbf{y}_i|, \quad (17)$$

where  $\mathbf{y}_i$  is a minimum vertex cut between source and sink node. This equation has the crucial benefit that  $|\mathbf{y}_i|$  does not depend on any unknown parameters and can be computed as the maximum flow from source to sink node with all nodes having unit capacity [1], as detailed in [Figure S2B](#). A flow is defined as a mapping from a network edge to a positive real number that is smaller than the edge’s capacity. Additionally, the sum of flows entering a node must equal the sum of the flows exiting a node, except for the source and the sink nodes. The maximum flow problem is to attribute (permissible) flow values to all edges, such that the sum of flows leaving the source (which is equal to the sum of flows entering the sink) is maximal. In our case however, we did not define edge but node capacities, meaning that the sum of flows passing through any node must not exceed one. Yet, we can express such unit node capacities as unit edge capacities in an extended flow network. It is defined by replacing every node by an *in*- and an *out*-node, where all incoming edges target the *in*-node, all outgoing edges start from the *out*-node, and the *in*-node has an edge to the *out*-node.

This maximum flow problem allows to express the algebraic identifiability conditions [14](#) and [15](#) in terms of network properties, providing an intuitive relationship between network topology, perturbation targets and identifiability. Specifically,  $J_i \hat{\mu}_{ij}$  is identifiable if and only if the removal of the edge from node  $\hat{\mu}_{ij}$  to the sink node reduces the maximum flow of the network, see [Figure S2C](#), and  $S_i \hat{\nu}_{ij}$  is identifiable if the maximum flow does not increase when an additional edges connects the source node with perturbation node  $\hat{\nu}_{ij}$ , see [Figure S2D](#). In [section S5](#), we simulate a perturbation experiment to numerically verify these findings.

## S2 Identifiability relationships

Network inference typically is an underdetermined problem for which the number of measurements falls short on the number of unknown interaction terms [4, 9], resulting in many non-identifiable parameters. To tackle this problem, we could construct identifiable models by fixing certain parameters to some constant values. Clearly, the remaining, inferred parameter values will then disagree with those that would have been obtained from a fully-determining experiment. Nevertheless, such effective models are useful as they allow for

meaningful comparisons of the inferred parameters between perturbation experiments on similar systems, e.g. when studying the same signalling pathway in different cell lines [3]. To derive such a determined system requires to study the relationship between non-identifiable parameters in the sense that we ask which parameters need to be fixed in order to render which other parameters identifiable. Even though the dimensionality of the solution space,  $d_i$ , is known, this question is not trivial, because even groups with  $d_i$  or fewer parameters might already be linearly dependent and fixing them will therefore not effectively reduce the degrees of freedom of the equation system.

Take as example a case where the first two rows of kernel matrix  $V_i$  from [Equation 12](#), are linearly dependent, that is  $\alpha \mathbf{V}_i^1 = \mathbf{V}_i^2$ . Then  $[\mathbf{x}_i]_1$  and  $[\mathbf{x}_i]_2$  are linearly dependent as well,  $[\mathbf{x}_i]_2 = \mathbf{V}_i^2 \mathbf{v} = \alpha \mathbf{V}_i^1 \mathbf{v} = \alpha [\mathbf{x}_i]_1$ , which implies that  $[\mathbf{x}_i]_2$  becomes identifiable if  $[\mathbf{x}_i]_1$  is known, and vice versa, even if  $d_i > 1$  ( $\hat{\mathbf{x}}_i$  was dropped to simplify notation). Moreover, prior knowledge on both  $[\mathbf{x}_i]_1$  and  $[\mathbf{x}_i]_2$  would overdetermine this linear subsystem and not further reduce the degrees of freedom for the remaining unknown parameters. Examining such parameter dependencies is a direct generalization of the original identifiability condition in [Equation 13](#). There, identifiability of an unknown parameter relied on a  $V_i$ -row being zero, that is, on a one-row submatrix being rank deficient. Now, we inspect not only single but groups of  $V_i$ -rows for rank deficiency. But which groups of rows should we consider to achieve an effective description of dependency? To answer this question let us first generalize the previous example.

We were asking if the  $j$ -th  $\mathbf{x}_i$  component becomes identifiable if a set of other  $\mathbf{x}_i$  components is known. With  $\mathcal{I}$  denoting the set of indices of these other components, let us recall [Equation 12](#) and name their homogeneous parts

$$\hat{\mathbf{x}}_i^{\mathcal{I}} = \mathbf{V}_i^{\mathcal{I}} \mathbf{v} \quad \text{and} \quad \bar{\mathbf{x}}_i^{\mathcal{I}} = V_i^{\mathcal{I}} \mathbf{v},$$

where  $\mathbf{V}_i^j$  is the  $j$ -th row of  $V_i$ , and  $V_i^{\mathcal{I}}$  the matrix that gathers all  $V_i$  rows with indices in  $\mathcal{I}$ . We can then put down a formal identifiability statement

$$\begin{aligned} \exists \mathcal{I} \subseteq \{1, \dots, u_i\} \setminus j, \exists \mathbf{w} \in \mathbb{R}^{|\mathcal{I}|} : \mathbf{V}_i^j = \mathbf{w}^T V_i^{\mathcal{I}} \\ \iff \hat{\mathbf{x}}_i^{\mathcal{I}} = \mathbf{w}^T V_i^{\mathcal{I}} \mathbf{v} = \mathbf{w}^T \bar{\mathbf{x}}_i^{\mathcal{I}}. \end{aligned} \quad (18)$$

In other words, if the  $j$ -th  $V_i$ -row lies within the row-space of the set of  $V_i$ -rows with indices  $\mathcal{I}$ , the  $j$ -th unknown parameter can be expressed as a linear combination of the set of parameters with indices  $\mathcal{I}$ . This means that knowledge of the set of parameters with indices  $\mathcal{I}$  then implies identifiability of the  $j$ -th parameter. However, this statement does not imply the uniqueness of  $\mathcal{I}$ . On the contrary, if the  $j$ -th  $V_i$ -row lies within the  $\mathcal{I}$ -associated row-space, it will also do so if additional  $V_i$  rows are added to the set. Similarly, there could be a linearly dependent subset of  $V_i$ -rows that all lie within the  $\mathcal{I}$  associated row-space. This would allow for multiple row-combinations to span the  $\mathcal{I}$ -associated row-space



and thus implicate the identifiability statement. Both cases show, that various combinations of additionally fixed parameters can imply the identifiability of a certain other parameter.

A comprehensive description of this combinatorial space arises from a mathematical structure that has been termed matroid [16]. Matroids are a generalized description of linear independence in vector spaces. Here we are concerned with representable matroids, which are those that specify linear (in-)dependence of any combination of columns of a matrix. Amongst their various equivalent definitions, the one that relates directly to our problem is the definition in terms of cyclic flats (also called circuit closures) and their ranks [13]. To specify these we need to define a few terms. First, let  $\mathcal{E}$  be the ground set of matroid  $\mathcal{M}$ , that is, the set of indices enumerating the columns of the associated matrix. Furthermore, define a circuit as a dependent set (of columns) whose proper subsets are all independent. The set of circuits can be enumerated with an incremental polynomial-time algorithm [2]. Finally, we define a flat as a subset of  $\mathcal{E}$ , with the associated submatrix having rank  $r$ , such the addition of any other element to the set would increase the rank. With this we can define  $\mathcal{C}_r$ , a cyclic flat of rank  $r$ , as a flat that is the union of a set of circuits with rank  $r$ . We show in the next section how to obtain cyclic flats from circuits and vice versa.

Let us now consider  $\mathcal{M}_i$ , the matroid whose ground-set  $\varepsilon_i$  covers the  $\mathbf{u}_i$  columns of  $(V_i)^T$ . Each element in  $\varepsilon_i$  is thus associated with an unknown parameter. The key inside is that  $\mathcal{M}_i$ 's set of circuits fully characterizes the identifiability relationships between the non-identifiable parameters. This is because the circuit dependency implies that any parameter represented by a given circuit element is identifiable when the remaining circuit elements are known. Additionally, this set of remaining parameters is guaranteed to be minimal because they are linearly independent. The enumeration of the circuits with the aforementioned algorithm requires a dependence oracle that indicates whether a column subset is dependent or not. For this, we first consider another matroid  $\mathcal{M}'_i$ , which is associated with the  $\mathbf{u}_i$  columns of  $\Psi_i$ , as defined in Equation 10. Because  $V_i$  spans the kernel of matrix  $\Psi_i$ ,  $\mathcal{M}'_i$  is dual to  $\mathcal{M}_i$  [16]. This implicates that the rank of the  $(V_i)^T$  column-subset  $\mathcal{I}$  relates to that of the complementary columns  $\tilde{\mathcal{I}} = \varepsilon_i \setminus \mathcal{I}$  of  $\Psi_i$  as follows

$$\text{rank}_{\mathcal{M}_i}(\mathcal{I}) = \text{rank}_{\mathcal{M}'_i}(\tilde{\mathcal{I}}) + |\mathcal{I}| - (\mathbf{u}_i - \mathbf{d}_i).$$

To investigate the dual rank, we note that we can establish the column subset of  $\Psi_i$  by a right multiplication with the  $\mathbf{u}_i \times |\tilde{\mathcal{I}}|$  matrix  $\mathcal{P}$ , which is an identity matrix where columns that correspond to missing indices in  $\tilde{\mathcal{I}}$  are removed. Furthermore, we subdivide elements in  $\tilde{\mathcal{I}}$  into sets  $\tilde{\mathcal{I}}_1$  and  $\tilde{\mathcal{I}}_2$  based on whether they are less than or equal to  $|\hat{\boldsymbol{\mu}}_i|$  or not, which allows to define matrices

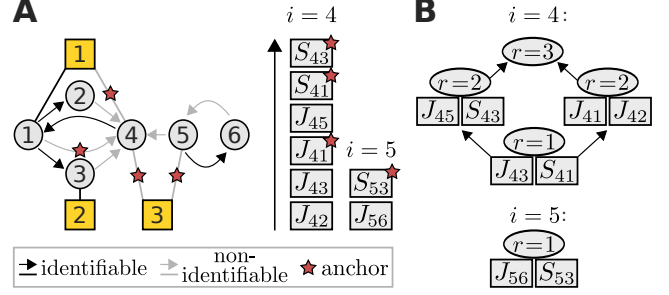

**Figure S3:** In this toy network (A), nodes 4 and 5 are associated with non-identifiable parameters. These can take values from certain linear sub-spaces whose hierarchy is represented by the lattices of cyclic flats of rank  $r$  (B). Each cyclic flat consists of the annotated elements in addition to elements from its preceding cyclic flats. To achieve identifiability requires to set certain parameters to a constant value. A preference to which parameters this should be is represented here as a ranked list (arrow indicates direction of increasing preference). The matroid formalism identifies the smallest and most preferred set of parameters that, when set to a constant value, render the network model fully identifiable. Here these are marked by red stars.

$\mathcal{P}_1$  and  $\mathcal{P}_2$  by the partitioning

$$\mathcal{P} = \begin{bmatrix} \mathcal{P}_1 & 0_{|\hat{\boldsymbol{\mu}}_i|, |\tilde{\mathcal{I}}_2|} \\ 0_{|\hat{\boldsymbol{\nu}}_i|, |\tilde{\mathcal{I}}_1|} & \mathcal{P}_2 \end{bmatrix}. \quad (19)$$

Then,

$$\begin{aligned} \text{rank}_{\mathcal{M}'_i}(\tilde{\mathcal{I}}) &= \text{rank}(\Psi_i \mathcal{P}) \\ &= \text{rank} \left( \begin{bmatrix} \hat{S}_i \hat{J}_i^{-1} \mathcal{P}_1 & \mathcal{P}_2 \\ \tilde{S}_i \hat{J}_i^{-1} \mathcal{P}_1 & 0_{|\hat{\boldsymbol{\nu}}_i|, |\tilde{\mathcal{I}}_2|} \end{bmatrix} \right) \\ &= |\tilde{\mathcal{I}}_2| + \text{rank} \left( \begin{bmatrix} \tilde{\mathcal{P}}_2^T \hat{S}_i \\ \tilde{S}_i \end{bmatrix} \hat{J}_i^{-1} \mathcal{P}_1 \right), \end{aligned} \quad (20)$$

where  $\tilde{\mathcal{P}}_2$  is the identity matrix without the columns that appear in  $\mathcal{P}_2$ . Left-multiplication by  $\tilde{\mathcal{P}}_2^T$  thus selects rows that correspond to missing indices in  $\tilde{\mathcal{I}}_2$ . The crucial point of this calculation is that we arrived at a matrix product that has the same form as the one discussed in the previous section. Therefore, the dual rank can be evaluated independently of the unknown entries in  $J$  and  $S$  because the last term in the previous equation equals to the maximum flow through the associated network, with connections from the source and to the sink nodes that are chosen according to  $\tilde{\mathcal{I}}$ , as shown. This allows to construct the oracle and identify the set of circuits. Therefore the identifiability relationships between unknown parameters can be inferred from information about network topology and perturbation targets alone.

Instead of listing the set of circuits, we propose cyclic flats as an equivalent but more concise representation of the identifiability relationships. They form a geometric lattice when ordered by inclusion (a cyclic flat precedes another if it is its proper subset) and can thus be graphically represented as a compact hierarchical structure. We demonstrate this for the example network shown in Figure S3. The depicted lattice makes the identifiability

relationships evident. All elements of a cyclic flat with rank  $r$  become identifiable if at least  $r$  independent flat elements are fixed. A set of elements is independent if fixing any combination of its elements does not render any of its other elements identifiable. Let us clarify this at an example where we are interested in determining the parameters that need to be fixed in order to make  $J_{43}$  identifiable. Following the previous rules, Figure S3 reveals that this could be achieved by fixing either  $S_{41}$  alone, or the parameter pairs  $J_{45} \cup S_{43}$  or  $J_{41} \cup S_{42}$ . In the latter two cases  $S_{53}$  would become identifiable as well.

When the goal is to achieve a fully identifiable network model, as discussed before, there typically are preferences as to which non-identifiable parameters should be fixed. For example, if there is noisy external data on parameter values we would rather fix those parameters values in which we have high confidence. Or, if we are to construct the aforementioned effective signalling models for the comparison of different cell lines, we would want to fix those parameters, which we expect to be equal between different cell lines and infer those parameters for which cell line differences are expected [3]. Thus, in these scenarios fixing of each parameter is associated with a certain preference (weight) and our goal is to find a minimum number of parameters that need to be fixed such that their sum of weights is maximal. In fact, matroids owe their striking appearance in combinatorial optimization because this problem is solvable with the Greedy Algorithm [12, 8]: Amongst the set of non-identifiable parameters in  $\epsilon_i$ , sequentially select the parameters with highest weight, that have not yet become identifiable from fixing the so-far selected set. Thus, instead of providing numerical weights for unknown parameters it is sufficient to rank them. We depict examples of such ordered lists in Figure S3 and show the resulting fully identifiable maximum-weight-model.

## Circuits and circuit closures

As both, the set of circuits and the circuit closures combined with their ranks, are an equivalent definition of a matroid they imply each other. Recall that circuits that contain a given network parameter describe the minimal sets of network parameters that need to be fixed to render that parameter identifiable. The flat of closures conveniently display these circuits as follows. By definition, any circuit is a  $r + 1$ -element subset,  $\mathcal{S}$ , of some cyclic flat  $\mathcal{C}_r$  with rank  $r$ . Thus, to obtain all circuits containing a certain parameter, consider all such subsets of cyclic flats that include this parameter. Yet  $\mathcal{S}$  is only a circuit if none of its subsets  $\underline{\mathcal{S}} \subset \mathcal{S}$  is dependent, in which case there is another circuit  $\underline{\mathcal{C}} \subseteq \underline{\mathcal{S}}$ . Since the lattice of cyclic flats is ordered by inclusion,  $\underline{\mathcal{C}}$  is a subset of a cyclic flat that precedes  $\mathcal{C}_r$  in the lattice. Therefore,  $\mathcal{S}$  is only a circuit if no cyclic flat preceding to  $\mathcal{C}_r$  contains a circuit that is a proper

subset of  $\mathcal{S}$ .

We mentioned that circuits can be enumerated in incremental polynomial-time [2]. In a next step, we generated circuit closures from the set of circuits. To this end, we first order circuits by size and iterate through that list. For each circuit of a given rank we identify circuits of up to its size whose intersection is equal or larger to its rank. Their union forms a circuit closure. Next, one continues the circuit iteration while skipping circuits that have already been assigned to a circuit closure. Eventually, this generates the entire ensemble of circuit closures. Find an implementation in the function `circuits2cyclic_flats` which is part of the `identifiability` module of the `IdentiFlow` package available at [github.com/GrossTor/IdentiFlow](https://github.com/GrossTor/IdentiFlow).

## S3 Experimental Design

Next, we describe the algorithmic implementation of the experimental design strategies.

### Depth-first search in strategy graph

The power set of the set of perturbations ordered by inclusion forms a directed graph (more formally a graded poset), where ancestors are proper subsets with one less element (e.g.  $\{P1, P2\}$ ,  $\{P1, P3\}$ , and  $\{P2, P3\}$  are all ancestors of  $\{P1, P2, P3\}$ ). Any perturbation sequences can thus be represented as a path on this graph, starting from the empty subset. Different experimental design strategies remove different subsets of edges, which yields what we want to call the strategy graph. Therefore strategies are associated with different subsets of (or even just single) sequences. To enumerate all strategy-associated perturbation sequences, we implemented a recursive depth-first search on the strategy graph:

```

1: procedure DFS( $\{S\}$ )
2:    $S^+ \leftarrow \text{NEXT\_PERTS}(\{S\})$ 
3:   for  $\{S\} \in S^+$  do
4:     fully_identifiable  $\leftarrow \text{MAX\_FLOW}(\{S\})$ 
5:     if not fully_identifiable then
6:       DFS( $\{S\}$ )
7:     else
8:       save  $S$ 
9:     end if
10:  end for
11: end procedure

```

Here,  $S$  denotes a perturbation sequence and  $\{S\}$  the set of perturbations in the sequence. To enumerate perturbation sequences, the DFS procedure is called with the empty set. It then parses the strategy graph and adds perturbations to the sequence sequentially. The strategy graph is built up dynamically in line 2 by the `NEXT_PERTS( $\{S\}$ )` function, as it returns  $S^+$ , the set of descendants of  $\{S\}$ . We will define it for the different strategies further below. Every descendant

(line 3) will instantiate a new instance of the DFS procedure (line 6), which will in turn continue parsing the graph, unless the descendent is either the maximal perturbation set, or a set of perturbations that fully determines the network. In this case, additional perturbations provide no additional network information, so that the search can be aborted and a strategy-associated sequence is found (and therefore saved in line 8). To query for network identifiability (line 4), we employ the maximum flow approach described in the previous sections. Note that, to enumerate all sequences the depth-first search does not terminate when it reaches a perturbation set that has previously been encountered. To avoid redundant computational effort, the calls to NEXT\_PERT and MAX\_FLOW are stored (Memoization). Strictly speaking, this violates the definition of a depth-first search. Nonetheless, we want to keep the terminology due to our procedure’s apparent analogy.

Let  $\{\bar{S}\}$  denote the set of all perturbations that are not in  $\{S\}$ , and let  $\hat{S}$  denote all proper supersets of  $\{S\}$  with size  $|\{S\}| + 1$ . That is,  $\hat{S}$  contains all perturbation sets that we can obtain by adding one element from  $\{\bar{S}\}$  to  $\{S\}$ . As mentioned before, NEXT\_PERT( $\{S\}$ ) returns a strategy-dependent subset of  $\hat{S}$ . For the *exhaustive* strategy a call to NEXT\_PERT( $\{S\}$ ) simply returns  $\hat{S}$  itself. Therefore, in this case the strategy graph coincides with the original power set inclusion graph and DFS( $\{\emptyset\}$ ) will store all perturbation sequences. The *random* strategy works similarly except that only a single perturbation set is chosen randomly from  $\hat{S}$ . Thereby, DFS( $\{\emptyset\}$ ) will return a single random perturbation sequence. The *naive* strategy considers the perturbed nodes for each perturbation and computes the number of network nodes to which these are connected to by a path. It then selects the perturbations in  $\{\bar{S}\}$  that maximize this number and NEXT\_PERT( $\{S\}$ ) returns the according subset from  $\hat{S}$ . In contrast, the *single-target* strategy selects the next perturbation candidates based on whether they efficiently reduce the degrees of freedom of the network. More specifically, the maximum-flow approach is applied (and memoized) for every perturbation set in  $\hat{S}$ . Amongst them, NEXT\_PERT( $\{S\}$ ) returns those that first maximize the number of identifiable interaction strengths and second minimize the sum of solution space dimensionalities,  $\sum d_i$ , as defined in Equation 11. Finally, the *multi-target* strategy is equivalent to the single-target strategy, except that it expands the set of possible perturbations by allowing for any combination of perturbations. For example, if originally there is a perturbation targeting each single node of the network, the multi-target approach would allow to pool perturbations such that there are single perturbations to target any set of nodes. Clearly, considering the entire power set of perturbation combinations makes such an approach feasible only for less than ten (original)

perturbations (see a discussion on computational complexity further below). Therefore, we also implemented a more efficient, hierarchical multi-target strategy, which was also the one applied in the analysis of the KEGG pathways (see next section and main text). Here, the considered set of perturbation combinations is built-up in a step-wise manner. First, we only consider single and pair perturbations (of elements in  $\{S\}$ ). Out of these, we perform a selection as in the single-target strategy. If a pair perturbation was within the selection, we also consider all combinations of three perturbations for the selection procedure. This continues until no perturbation combination of largest size is in the selection or the entire power set of  $\{S\}$  is considered.

Analogous to the random strategy that makes a random choice amongst the candidate perturbations of the exhaustive strategy, we implemented the option to randomly pick a single perturbation set amongst the possible candidates also for the naive, the single- and multi-target strategies. Thus, a run of DFS( $\{\emptyset\}$ ) will then select a single perturbation sequence. Repeated calls to DFS( $\{\emptyset\}$ ) will thus generate random samples amongst the set of perturbation sequences that are associated with the chosen strategy. This sampling procedure becomes essential if the number of perturbations and strategy associated sequences becomes too large to make a complete depth-first search computationally tractable. Let us thus briefly characterize the computation complexity of the experimental design strategies.

## Computational complexity of experimental design strategies

The computational complexity of the depth-first search is dominated by the calls to the MAX\_FLOW routine. We therefore want to count how many times it gets called by different strategies. As the parsing of the strategy graph stops whenever a fully determining perturbation set is reached, this number is not just a function of network size ( $n$ ) and number of perturbations ( $p$ ), but will crucially depend on the specific network topology and perturbation targets. To still provide a rough estimate for an upper complexity bound, we will disregard such early stopping. Due to memoization, MAX\_FLOW will not be called repeatedly if a certain perturbation set is revisited during the depth-first search. Thus, its number of calls equals to the number of different perturbation sets that were parsed during the depth-first search. For the exhaustive strategy this will be all  $2^p$  nodes. For all other strategies besides the random strategy, this number will again be highly sensitive to the specific perturbation network so that we cannot make any general statements. Thus, we want to consider the case where we randomly sample a single strategy associated sequence, as described before. Then the naive and random strategies will parse  $p$  perturbation sets (where for each perturbation set the naive strategy has the additional overhead of computing the most



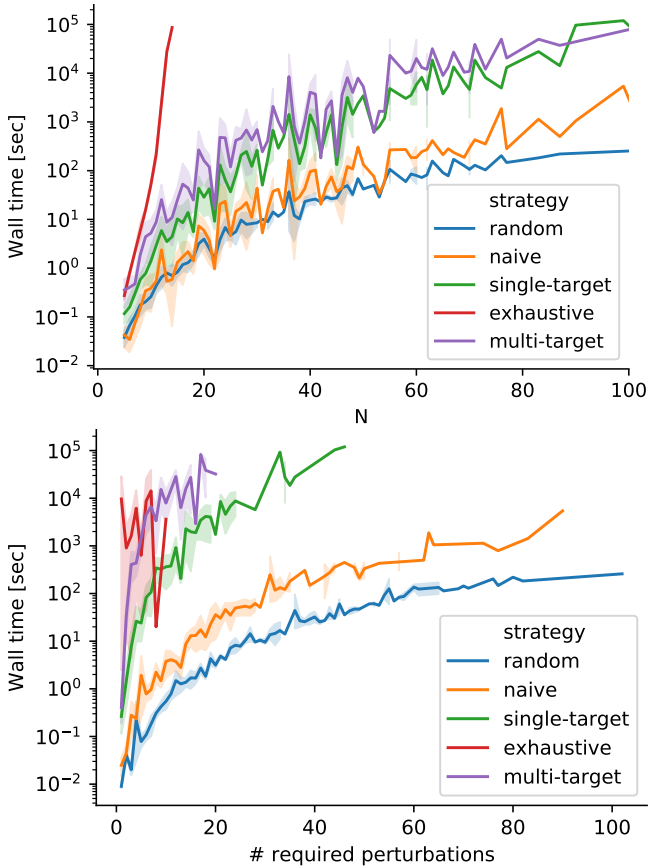

**Figure S4:** Computational running times to compute perturbation sequences on KEGG pathways with different experimental design strategies. Lines go through mean wall times over all KEGG pathways of the same size in the upper graph and all KEGG pathways that require the same number of perturbations for full identifiability in the lower graph.

upstream perturbations as described above). For every perturbation set  $\{S\}$  that is parsed by the single-target strategy,  $\text{NEXT\_PERT}(\{S\})$  will call  $\text{MAX\_FLOW}$  for every descendant of  $\{S\}$  in the strategy graph. Due to memoization, this yields  $\sum_i^p (p-i) \propto p^2$  calls. The number of  $\text{MAX\_FLOW}$  calls used by the (hierarchical) multi-target strategy is again highly dependent on the specific perturbation network. But at least, this strategy will additionally consider all pair perturbations and thus yield more than  $\sum_i^p (p+p(p-1)/2-i) \propto p^3$  calls.

Finally, we also require an estimate for the complexity of  $\text{MAX\_FLOW}(\{S\})$ . Also here, the flow network as defined in previous sections varies with network topology and perturbation targets and so does the computational effort to compute maximum flow. We will thus make some estimations based on the assumption that biological networks are rather sparse, with a number of edges that is roughly proportional to the number of nodes and that perturbations tend to be specific to a few nodes. Thus for the unit edge capacity flow network (recall the definition in the Methods of the main text), we assume for the number of edges,  $E \approx n + n + p + \mathcal{O}(1)$  ( $\approx$  edges in original network + edges between *in*- and *out*-nodes + source edges + sink edges). Due to the con-

version in *in*- and *out*-nodes, a flow network has  $N = 2n$  nodes. As noted in the main text, algorithms are known to find maximal flows in unit capacity networks with  $\mathcal{O}(\min(N^{2/3}E, E^{3/2}))$  computations [1]. However, in the *IdentiFlow* package, we implemented the well established Edmonds-Karp algorithm which has a complexity of  $\mathcal{O}(NE^2)$ . To determine the identifiability of the entire networks requires to solve  $n$  maximum-flow problems. Thus, we can estimate the computational complexity of a call to  $\text{MAX\_FLOW}(\{S\})$  with  $\mathcal{O}(n^4 + n^2p^2)$ . Overall, this gives the following upper bounds for the complexity of the experimental design computations

| strategy              | complexity                     |
|-----------------------|--------------------------------|
| <i>random / naive</i> | $\mathcal{O}(n^4p + n^2p^3)$   |
| <i>single-target</i>  | $\mathcal{O}(n^4p^2 + n^2p^4)$ |
| <i>multi-target</i>   | $\mathcal{O}(n^4p^3 + n^2p^5)$ |
| <i>exhaustive</i>     | $\mathcal{O}(n^42^p)$          |

In practice, the computational effort is often much lower than these theoretical bounds suggest. To this end, we measured computational running times that were needed to determine the experimental designs for a collection of KEGG pathways (for more details see next section). [Figure S4](#) shows the according wall times, where each perturbation sequence was computed on a single core with 2.3 Ghz. Note that network size and the number of perturbations that is required for full identifiability are not independent of each other (see [Figure S6](#)).

## S4 Perturbation experiments for KEGG pathways

KEGG data [10] was retrieved using the KEGG API. We retrieved KGML files for human pathways and from them build network representations based on their 'relation elements'. For each such representation we computed the size of its largest connected component. The pathway was filtered out if it was smaller than five.

The performance of the exhaustive strategy could be observed for small pathways [Figure S5 A](#). In addition, we further confirmed our hypothesis that the isolation score is predictive with respect to the performance of the design strategies [Figure S5 B](#). Furthermore, [Figure S6](#) compares for each KEGG pathway the number of perturbations that are required to achieve a fully identifiable network using the different strategies. We also studied how our experimental design strategies compared against a strategy that chooses random sequence of combination perturbations. Thus, for each KEGG pathway, we generated perturbation sequences by sequentially drawing perturbation combinations from the power set of single perturbations (excluding the empty set) and measured their performance, shown in [Figure S7](#) (annotated as multi-random). The multi-random

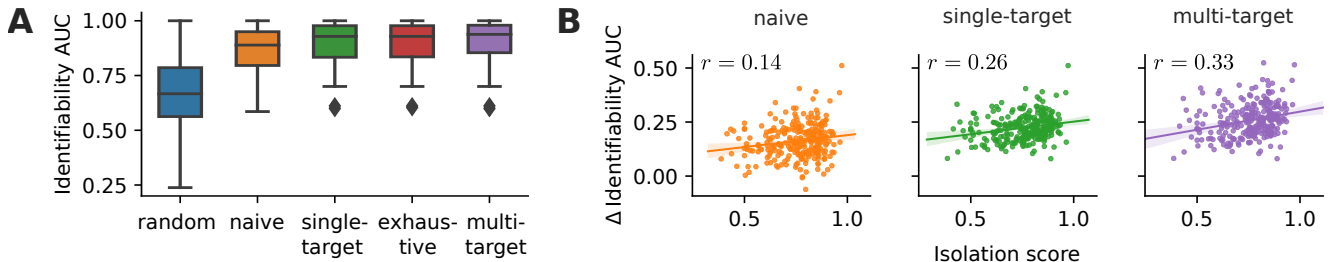

**Figure S5:** Performance of different experimental design strategies on 78 human KEGG pathways with up to 15 nodes (A). The single-target and exhaustive strategies show identical performance. The difference between the identifiability AUC between non-random to random strategies negatively correlates (Spearman correlation coefficient  $r$ ) with the isolation score (B). Here, all human KEGG pathways are considered.

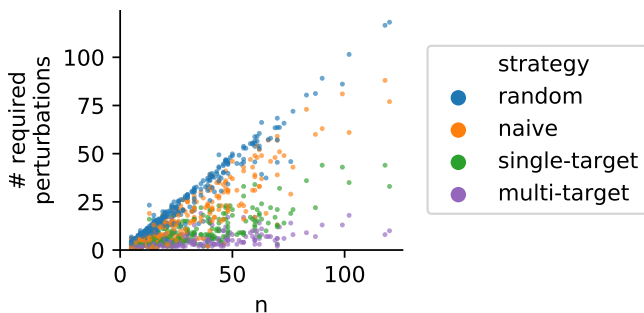

**Figure S6:** Number of perturbations required for full network identifiability for each considered KEGG pathway (of size  $n$ ) and strategy. For the random strategy, we show the average number over 10 random perturbation sequences.

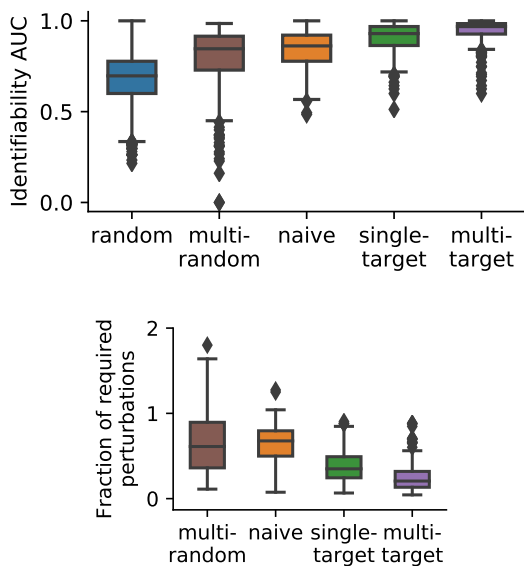

**Figure S7:** Identifiability AUC, defined as area under the number of identified nodes vs. number of perturbation curve, see Eqn. 13 in main text (top figure). Average number of perturbations required for full identifiability is shown relative to the average number required for a random strategy (bottom figure). Same data as in main text Figure 4 A and B with additional multi-random strategy.

strategy is approximately en par with the naive strategy but is outperformed by the single- and multi-target strategies.

## S5 Verification by numerical simulation

To verify our analytical description of identifiability of network parameters, we numerically simulated the perturbation experiment depicted in Figure S3A. This was done by allocating random numbers to each network parameter, where all random numbers were drawn from a standard normal distribution. We then computed steady state responses to perturbations,  $R$ , according to Equation 4 (with  $P = I_p$ ). From this synthetic data, we infer the original network parameters by solving the following least squares problem

$$\min_{J,S} \sum_i^n \sum_j^p \left( R_{ij} - [J^{-1}S]_{ij} \right)^2,$$

where only the unknown parameters in  $J$  and  $S$  are allowed to vary. To this end, we employ the least-squares solver from the SciPy library [15]. We repeated the procedure for 50 different sets of random network parameters. For each of these synthetic perturbation experiments, we perform the fitting with 50 different initial conditions generated by Latin Hypercube sampling within the interval -1 to 1. The absolute differences between the fitted and the original parameters are depicted in Figure S8A.

Each parameter that is declared identifiable by the maximum flow approach (see Figure S3A) shows indeed a near zero deviation. Whereas all non-identifiable parameters show considerable deviations. This confirms our analytical findings. It also shows that the numerical simulations are generally unreliable, as we observe many non-zero deviations for identifiable parameters and near-zero deviations for non-identifiable parameters. An identifiability analysis through numerical simulation thus relies on many repetitions and arbitrary thresholds, which also makes it computationally expensive and therefore inept for experimental design especially for larger systems.

Furthermore, we analysed the fit's sensitivity to noise. Random numbers drawn from normal distributions with zero mean and different standard deviations (Noise levels in Figure S8B) were added to each entry in the simulated  $R$ . The same fitting procedure was

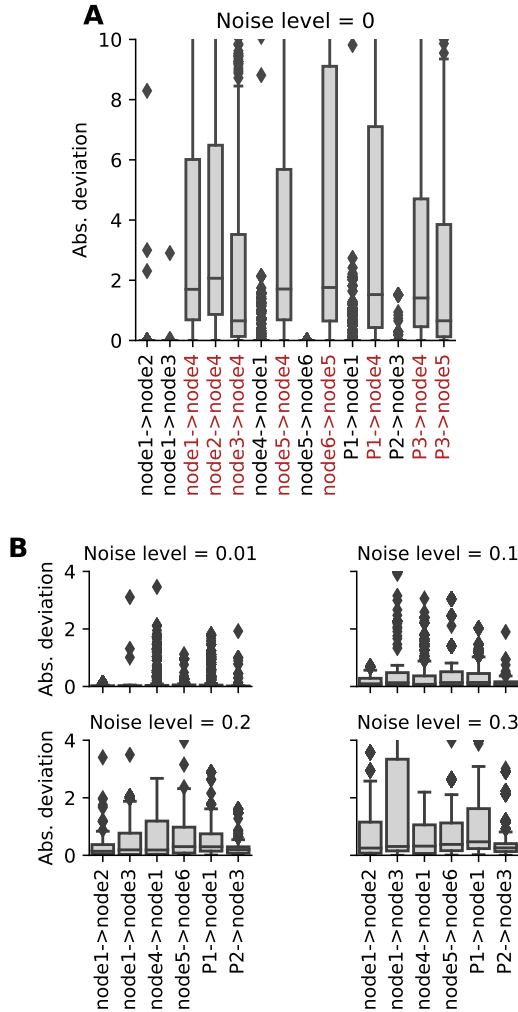

**Figure S8:** Absolute differences between inferred and original network parameters for the synthetic perturbation experiments depicted in Figure S3A. Shown are distributions over 50 random original parameter sets and 50 initial fitting conditions each. Network parameters that were declared non-identifiable by the maximum-flow approach are annotated in red. **A** Deviations for all network parameters in the absence of noise. Only identifiable parameters (according to maximum-flow approach, compare Figure S3A) have nearly zero deviations. **B** Deviations of identifiable network parameters with different levels of noise in the synthetic response data.

carried out for such noisy response data and the results are shown in Figure S8B (only identifiable parameters are shown). We observe that the median inference error for each parameter is approximately equal to the (additive) noise level. In individual fits however, some inferred parameters can drastically differ from their original counterpart. Yet, the fitting procedure is not the focus of this article and we refer to the reader to other references that aim to improve the robustness to noise [14, 5].

Numerical simulations also allow to investigate how the identifiability of network parameters is altered when assumptions in the maximum-flow approach are broken. For this purpose, we simulate saturation effects

by setting some of the original network parameters to zero without considering them as known parameters. Therefore the identifiability analysis by the maximum-flow approach remains unchanged. However Figure S9 shows that indeed some previously identifiable parameters become non-identifiable and vice versa in such saturation setting. In detail, we performed noise-free numerical simulations of the perturbation experiment outlined in Figure S3A as before. However in Figure S9A and Figure S9B, we considered the possibilities that multi-target perturbation 3 is not effective with respect to either of its targets. Interestingly, Figure S9A shows that an ineffective perturbation of node 4 does not alter identifiability, including the fact that it remains impossible to infer from the response data that the sensitivity of node 4 to perturbation 3 is in fact zero. On the other hand, a zero sensitivity of node 5 to perturbation 4 is, contrary to the maximum-flow results, actually identifiable, as shown in Figure S9B (which is rather trivial as perturbation 3 no longer causes a response at node 5). However, this comes at the cost of losing identifiability of the interaction strength from node 5 to node 6. Similarly, we explored the loss of connectivity between nodes. Again, in our examples, we observed qualitatively different possibilities. While a vanishing interaction strength from node 2 to node 4 does not alter the identifiability of any network parameters (Figure S9C), we observe that the previously non-identifiable interaction strength from node 3 to node 4 becomes identifiable when it is set to zero (Figure S9D).

## References

- [1] Ravindra K. Ahuja, Thomas L. Magnanti, and James B. Orlin. *Network Flows: Theory, Algorithms, and Applications*. Prentice Hall, Englewood Cliffs, N.J., 1993.
- [2] Endre Boros, Khaled Elbassioni, Vladimir Gurvich, and Leonid Khachiyan. Algorithms for Enumerating Circuits in Matroids. In Toshihide Ibaraki, Naoki Katoh, and Hirotaka Ono, editors, *Algorithms and Computation*, Lecture Notes in Computer Science, pages 485–494, Berlin, Heidelberg, 2003. Springer.
- [3] Evert Bosdriesz, Anirudh Prahallad, Bertram Klinger, Anja Sieber, Astrid Bosma, René Bernards, Nils Blüthgen, and Lodewyk F. A. Wesels. Comparative Network Reconstruction using mixed integer programming. *Bioinformatics*, 34(17):i997–i1004, January 2018.
- [4] Riet De Smet and Kathleen Marchal. Advantages and limitations of current network inference methods. *Nat. Rev. Microbiol.*, 8(10):717–729, October 2010.
- [5] Mathurin Dorel, Bertram Klinger, Torsten Gross, Anja Sieber, Anirudh Prahallad, Evert Bosdriesz,

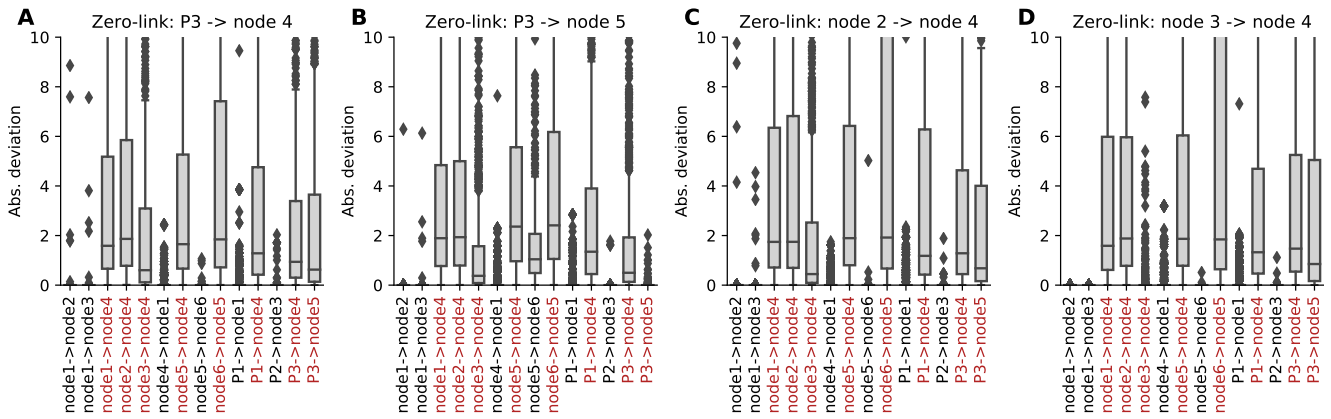

**Figure S9:** Absolute differences between inferred and original parameters for the same setting as in Figure S8, except that the parameters denoted in the titles of each subfigure are set to zero when simulating the response data. Again, network parameters that were declared non-identifiable by the maximum-flow approach are annotated in red.

Lodewyk F. A. Wessels, and Nils Blüthgen. Modelling signalling networks from perturbation data. *Bioinformatics*, 34(23):4079–4086, January 2018.

- [6] Shimon Even and Guy Even. *Graph Algorithms*. Cambridge University Press, Cambridge, NY, 2nd ed edition, 2012.
- [7] Raphaela Fritsche-Guenther, Franziska Witzel, Anja Sieber, Ricarda Herr, Nadine Schmidt, Sandra Braun, Tilman Brummer, Christine Sers, and Nils Blüthgen. Strong negative feedback from Erk to Raf confers robustness to MAPK signalling. *Molecular Systems Biology*, 7(1):489, January 2011.
- [8] David Gale. Optimal assignments in an ordered set: An application of matroid theory. *Journal of Combinatorial Theory*, 4(2):176–180, March 1968.
- [9] Torsten Gross, Matthew J. Wongchenko, Yibing Yan, and Nils Blüthgen. Robust network inference using response logic. *Bioinformatics*, 35(14):i634–i642, July 2019.
- [10] Minoru Kanehisa, Yoko Sato, Miho Furumichi, Kaneae Morishima, and Mao Tanabe. New approach for understanding genome variations in KEGG. *Nucleic Acids Res.*, 47(D1):D590–D595, January 2019.
- [11] Karl Menger. Zur allgemeinen Kurventheorie. *Fundam. Math.*, 10(1):96–115, 1927.
- [12] James Oxley. What is a Matroid? *CUBO Math. J.*, 5(3):176–215, October 2003.
- [13] James G. Oxley. *Matroid Theory*. Number 3 in Oxford Graduate Texts in Mathematics. Oxford Univ. Press, Oxford, reprinted edition, 2006. OCLC: 255501879.
- [14] Tapesh Santra, Oleksii Rukhlenko, Vadim Zhernovkov, and Boris N. Kholodenko. Reconstructing static and dynamic models of signaling pathways using Modular Response Analysis. *Current Opinion in Systems Biology*, 9:11–21, June 2018.
- [15] Pauli Virtanen, Ralf Gommers, Travis E. Oliphant, Matt Haberland, Tyler Reddy, David Cournapeau, Evgeni Burovski, Pearu Peterson, Warren Weckesser, Jonathan Bright, Stéfan J. van der Walt, Matthew Brett, Joshua Wilson, K. Jarrod Millman, Nikolay Mayorov, Andrew R. J. Nelson, Eric Jones, Robert Kern, Eric Larson, CJ Carey, İlhan Polat, Yu Feng, Eric W. Moore, Jake VanderPlas, Denis Laxalde, Josef Perktold, Robert Cimrman, Ian Henriksen, E. A. Quintero, Charles R. Harris, Anne M. Archibald, Antônio H. Ribeiro, Fabian Pedregosa, Paul van Mulbregt, and SciPy 1.0 Contributors. SciPy 1.0: Fundamental Algorithms for Scientific Computing in Python. *Nature Methods*, 17:261–272, 2020.
- [16] Hassler Whitney. On the Abstract Properties of Linear Dependence. *American Journal of Mathematics*, 57(3):509, July 1935.
